1 Title: **Female fruit flies cannot protect stored sperm from high temperature damage**

2

3 Authors: Benjamin S. Walsh<sup>1\*</sup>, Steven R. Parratt<sup>1</sup>, Rhonda R. Snook<sup>2</sup>, Amanda Bretman<sup>3</sup>,

4 David Atkinson<sup>1</sup> & Tom A. R. Price<sup>1</sup>

5

6 1 Institute of Integrative Biology, Crown Street, University of Liverpool, Liverpool, UK

7 2 Department of Zoology, Stockholm University, Stockholm, Sweden

8 3 Faculty of Biological Sciences, University of Leeds, Leeds, UK

9 \* Corresponding author ([bwalsh@liverpool.ac.uk](mailto:bwalsh@liverpool.ac.uk))

10 **Abstract**

11 Recently, it has been demonstrated that heat-induced male sterility is likely to shape  
12 population persistence as climate change progresses. However, an under-explored  
13 possibility is that females may be able to successfully store and preserve sperm at  
14 temperatures that sterilise males, which could ameliorate the impact of male infertility on  
15 populations. Here, we test whether females from two fruit fly species can protect stored  
16 sperm from a high temperature stress. We find that sperm carried by female *Drosophila*  
17 *virilis* are almost completely sterilised by high temperatures, whereas sperm carried by  
18 female *Zaprionus indianus* show only slightly reduced fertility. Heat-shocked *D. virilis*  
19 females can recover fertility when allowed to remate, suggesting that the delivered heat-  
20 shock is destroying stored sperm and not directly damaging females in this species. The  
21 temperatures required to reduce fertility of mated females are substantially lower than the  
22 temperatures required to destroy mature sperm in males, suggesting that females are  
23 worse than males at protecting mature sperm. This suggests that female sperm storage is  
24 unlikely to ameliorate the impacts of high temperature fertility losses in males, and instead  
25 exacerbates fertility costs of high temperatures, representing an important determinant of  
26 population persistence during climate change.

27 **Keywords:** fertility, female sperm storage, heat stress, climate change

## 28 **Background**

29 Anthropogenic climate change poses a significant challenge to global biodiversity. We  
30 urgently need to understand how rising average temperatures, and an increasing number of  
31 short-term extreme temperature events (Perkins-Kirkpatrick and Lewis, 2020), will affect  
32 natural populations. Understanding how high temperatures affect organisms can allow  
33 researchers to predict the vulnerability of species and inform conservation efforts, revealing  
34 which temperature-sensitive traits are particularly important for determining species  
35 persistence. Initial research focused on temperatures required to kill individuals, and it has  
36 been shown that species' lethal temperatures correlate with the maximum temperatures  
37 species experience in the wild (Kellermann et al., 2012). It has been known for around a  
38 century that high temperatures can sterilise individuals (Cowles, 1945; David et al., 2005;  
39 Young and Plough, 1926). Recent work has found that the temperature that sterilises over  
40 80% of males in a species, named a species' upper thermal fertility limit (TFL), correlate  
41 more strongly with maximum temperatures that species experience in the wild (Parratt et  
42 al., 2021; van Heerwaarden and Sgrò, 2021). This indicates that upper TFLs are significant  
43 determinants of current species distributions, and are therefore likely to shape population  
44 persistence as climate change progresses.

45 Temperature-induced sterility occurs across a wide-variety of taxonomic groups (David et  
46 al., 2005; Hurley et al., 2018; Karaca et al., 2002; Sage et al., 2015; Walsh et al., 2019b). A  
47 study of 43 *Drosophila* fruit fly species found that males from nearly half the species (19/43)  
48 are sterilised at temperatures significantly lower than temperatures required to kill them  
49 (Parratt et al., 2021). Male fertility generally seems more sensitive to high temperatures  
50 when directly compared with female fertility (Iossa, 2019; Sales et al., 2018; Walsh et al.,

51 2020), although the converse is possible (Janowitz and Fischer, 2011). The relative sensitivity  
52 of male fertility in animals has been attributed to disruption of spermatogenesis or death of  
53 mature sperm as a result of thermal stress (Rohmer et al., 2004; Sales et al., 2018). Typically,  
54 the effect of temperature on fertility is measured by directly heating males, and  
55 subsequently measuring the reproductive capacity of focal males when paired with females  
56 following heat-stress (Jørgensen et al., 2006; Karaca et al., 2002; Parratt et al., 2021; Sales et  
57 al., 2018; Walsh et al., 2020; Zwoinska et al., 2020) or by measuring other traits linked to  
58 fertility (Hurley et al., 2018; Paxton et al., 2016). Likewise, studies measuring female fertility  
59 generally stress females prior to mating (Sales et al., 2018; Walsh et al., 2020; Walsh et al.,  
60 2019a), in order to isolate the effect of temperature on female reproductive physiology,  
61 such as oocytes. However, while it is clearly important to measure the effect of thermal  
62 stress prior to mating, the effect of high temperatures on females post-mating has been  
63 largely ignored. This is important because sperm can spend a significant proportion of time  
64 within the female reproductive tract prior to fertilisation.

65 Sperm storage is characterised by temporal delays between insemination and fertilisation,  
66 during which sperm is maintained within a female's reproductive tract. Female sperm  
67 storage is common across taxa, including mammals, birds, reptiles, fish and insects (Holt,  
68 2011; Sever and Hamlett, 2002). The time that sperm can be kept viable inside a female  
69 varies substantially. In birds and reptiles, sperm storage durations range from seven days up  
70 to seven years, in mammals for less than a day up to six months in some bat species,  
71 amphibians from four to thirty months, in fish from only days to around two years, and over  
72 a decade in some eusocial hymenoptera (Birkhead and Møller, 1993; Holt and Lloyd, 2010;  
73 Holt, 2011; Keller, 1998; Levine et al., 2021; Pamilo, 1991). The method of sperm storage  
74 can also vary substantially, and phylogenetic evidence suggests long-term storage of sperm

75 has arisen independently across taxa (Holt and Lloyd, 2010). For example in birds and some  
76 reptiles, inseminated spermatozoa are stored in microscopic sperm storage tubules (SSTs)  
77 embedded in the infundibulum, which allow sperm to survive for extended periods of time  
78 (Holt, 2011; Sasanami et al., 2013). Females from the majority of insects and some other  
79 arthropods store sperm in a highly chitinised specialised organ called the spermatheca.  
80 Most insects have one spermatheca, but some insects have two or three (Pascini and  
81 Martins, 2017). However, while female sperm storage for extended durations is  
82 taxonomically widespread (Birkhead and Møller, 1993), the impact of high temperatures on  
83 sperm stored within mated females is currently understudied. The few efforts to examine  
84 the impact of high temperatures on sperm stored within females include mated females of  
85 the red flour beetle (*Tribolium castaneum*), which show a 33% reduction in offspring  
86 production when exposed to a heatwave treatment (Sales et al., 2018). Also, a four hour  
87 heat-stress at 42°C significantly reduces the viability of sperm stored by honey bee queens  
88 (McAfee et al., 2020), although in this study the authors do not directly test whether this  
89 reduces female offspring production. Given the urgency of understanding the consequences  
90 of rising temperatures, we need a better understanding of the thermal robustness of female  
91 sperm storage.

92 Fruit flies from the family Drosophilidae provide a useful model group to explore this  
93 question. Female *Drosophila* typically possess a pair of spermathecae and a seminal  
94 receptacle, the latter of which is a thin extended tubule arising from the uterus (Pitnick et  
95 al., 1999). *Drosophila* have been proposed as a model system for studying sperm-female  
96 interactions, in order to better understand fertilisation across taxa (Heifetz and Rivlin, 2010).  
97 *Drosophila* are also a model taxon for studying thermal reproductive physiology, including  
98 examining how high temperatures affect fertility of both males and females prior to mating

99 (David et al., 2005; Parratt et al., 2021; Sgrò et al., 2016; Walsh et al., 2020). However, to  
100 our knowledge there has been no substantial effort to examine how high temperatures  
101 affect the capacity of mated females to produce offspring in *Drosophila*.

102 Here, we explore the impact of heat stress on sperm storage in females from two *Drosophila*  
103 species. We test the tropical pest species *Zaprionus indianus*, and a more temperate species  
104 *Drosophila virilis*. Parratt et al. (2021) showed that males of both species die when exposed  
105 to ~38°C for 4 hours, and (Parratt et al., 2021) that mature sperm are destroyed at ~37°C for  
106 4 hours when stored in male *D. virilis*, but not in male *Z. indianus*. In contrast, the same  
107 study found that developing sperm appear to be destroyed by high temperatures in both  
108 species. Males of both species are sterile 7 days after being heated at ~35°C for 4 hours.  
109 However, we do not know the effect of high temperatures on sperm stored within mated  
110 females.

111 We test three components of female fertility across time. Firstly, we test the expectation  
112 that female fertility will be more robust to high temperatures than male fertility. Secondly,  
113 we test whether sperm stored in mated females are more or less sensitive to high  
114 temperatures than sperm stored in a male's seminal vesicles and developing sperm within  
115 the testes, investigated previously. Finally, we explore whether mated females that are  
116 heated to a point that sterilises them can recover fertility, after being presented with new  
117 male partners. If sterilised mated females can recover by remating, this would suggest that  
118 heat induced sterility of mated females is caused by damage to sperm and not direct  
119 damage to females.

## 120 **Materials and Methods**

### 121 ***Animal stock maintenance***

122 Stocks of *Drosophila virilis* (Cambridge Fly Facility StrainvS-4, isolated in 1991) and *Zaprionus*  
123 *indianus* (DSSC Stock #: 50001-0001.05 ISOFEMALE, isolated in 2004), were kept in a  
124 temperature-controlled incubator (LMS 600NP Series 4) at 23°C, 12:12 L:D and ambient  
125 humidity. Stocks were maintained at moderate density (50 – 100 flies per 300ml bottle  
126 culture). *D. virilis* were kept on standard cornmeal-molasses-agar media, and *Z. indianus*  
127 were kept on banana medium. Ovipositing adults for both species were tipped to new food  
128 every week to prevent overlapping generations, and were replaced with fresh sexually  
129 mature adult flies every 4-6 weeks.

### 130 ***Experimental treatments***

131 Experimental treatments are summarised in Figure 1. We assessed whether heat stress  
132 influences fertility of females when delivered before mating (Experiment 1). We then  
133 completed an experiment with two more treatment combinations (Experiment 2a & 2b) to  
134 address the outstanding question of whether mated females can protect stored sperm from  
135 temperature damage experienced post-mating, and isolate effects on stored sperm from  
136 changes to female egg-laying behaviour.

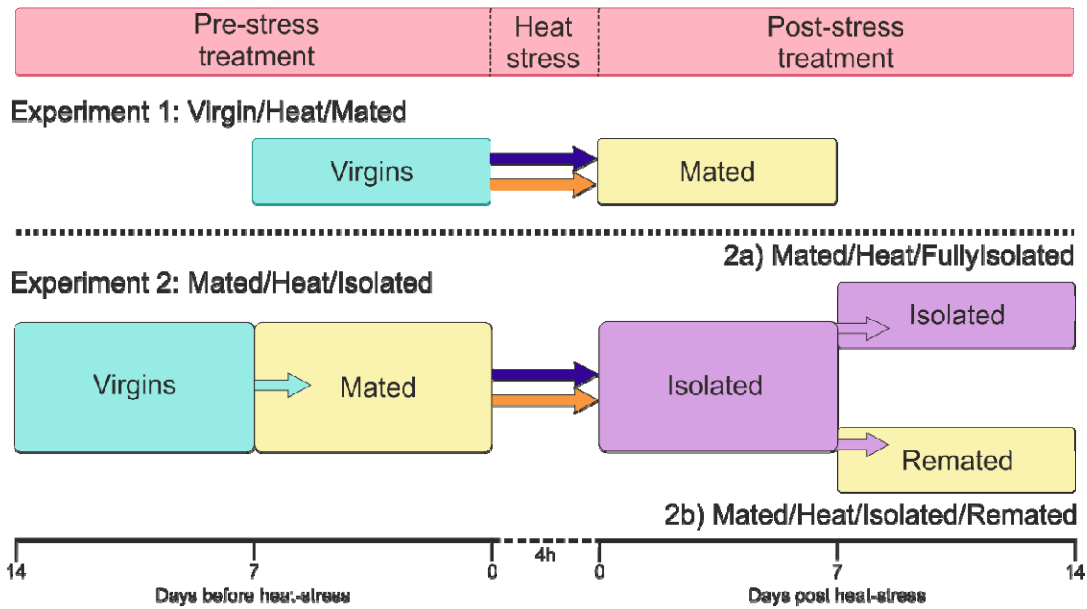

137

138 **Figure 1:** Experimental design outlining the two experiments. Each treatment designation

139 combines various pre and post-stress mating treatments. **Experiment 1:**

140 **Virgin/Heat/Mated**, where virgin females were heat-stressed and mated following heat-

141 stress. **Experiment 2: Mated/Heat/Isolated**, where mated females are heat-stressed and

142 kept alone for 7 days to produce offspring from previous matings. After 7 days post heat-

143 stress, the experiment was divided into two treatments. For an additional 7 days, females

144 were either kept in isolation (**2a: Mated/Heat/FullyIsolated**), or given new male partners to

145 mate with (**2b: Mated/Heat/Isolated/Remated**). Focal females were exposed to either

146 benign (23°C) or stress (35 & 36°C) temperatures for 4h in water baths. Day 0 in the post-

147 stress treatment represents the time-point when the fertility assay begins (Fig. 2 & Fig. 3).

148

149 We chose to mate females at 7 days old when fully sexually mature, and kept this consistent

150 between experiments. Therefore, females from Experiment 1 are 7 days old at heat-stress,

151 whereas females from Experiment 2 are 14 days old at heat-stress. Prior to heat stress,



152 females from Experiment 1 were separated at emergence and kept as virgins in groups of 10  
153 for 7 days. Females from Experiment 2 were separated as virgins and kept in groups of 10  
154 for 7 days, then provided with sexually mature males (7 days old) at a 1:1 sex ratio for a  
155 further 7 days prior to heat-stress. This produced an ‘assumed’ mated treatment, where  
156 females would have many opportunities to mate with a variety of males.

157 Immediately following heat stress, females were transferred to individual fresh food vials. In  
158 Experiment 1, virgin females were immediately placed with 4 virgin males. This mating  
159 group was moved to fresh vials twice, creating 3 ‘time-points’ where fertility was recorded.  
160 Females in Experiment 2 were isolated and transferred to fresh vials giving 3 time-points  
161 over 7 days. Experiment 2 was then split into two treatments. Females from Experiment 2a  
162 were kept in isolation for an additional 7 days, producing 3 more time-points where females  
163 were isolated. Females from Experiment 2b were placed with 4 males following the first 7  
164 days of isolation. This mating group was transferred onto new vials twice more, giving 3  
165 time-points where the females were isolated, followed by 3 recorded time-points where  
166 females were paired with males. Females were deemed as qualitatively fertile at a given  
167 time-point if there was evidence of larvae present in their vial (1/0), measured by directly  
168 observing larvae or their distinctive tracks in the food.

### 169 ***Heat-stress***

170 Groups of 10 females were transferred to fresh 25 x 95mm plastic vials, containing 25ml of  
171 ‘ASG’ medium (10g agar, 85g sucrose, 20g yeast extract, 60g maize, 1000ml H<sub>2</sub>O, 25ml, 10%  
172 Nipagin) to prevent desiccation. These vials were randomly assigned to pre-heated water-  
173 baths (Grant TXF200) for four hours at either control: 23°C, or two stress temperatures:  
174 35°C & 36°C. The chosen temperatures do not affect survival or immediately sterilise mature

175 adult males of either species, but result in substantial delayed sterility of males, likely due to  
176 the destruction of developing sperm (Parratt et al., 2021). Immediately following heat-  
177 treatment, flies were returned to benign temperatures (23°C).

### 178 ***Statistical analyses***

179 Species and experiments were analysed separately due to inherent differences in  
180 methodological design as summarised in Fig. 1. Treatment of females in Experiment 2 are  
181 identical from the start of the experiment until the experiment is split after 7 days into the  
182 post stress treatment. Therefore, data from Experiment 2 over the first 3 time-points were  
183 analysed together. The final 3 time-points of Experiment 2a after splitting were not  
184 statistically analysed, as all flies of both species in these final 3 time-points were completely  
185 sterile with only one exception, making these data uninformative. Experiment 2b was  
186 analysed after the treatments were split and females were presented with new males, in  
187 order to assess differences in fertility recovery across temperature treatments.

188 To assess the effect of temperature on fertility we used generalised linear mixed models  
189 with Bernoulli error distributions. We fitted fertility as a binary response variable,  
190 temperature and time-point and their interaction as fixed effects, and focal fly ID as a  
191 random effect to account for repeated measures. We did model selection using Wald Chi-  
192 squared likelihood ratio-tests, removing non-significant interactions. We retained all main  
193 effects and reported statistics of these from type II likelihood ratio tests using the 'Anova'  
194 function from the 'car' package, in the statistical software 'R'. We then reported any  
195 pairwise comparisons in which  $p < 0.05$ .

196 **Results**

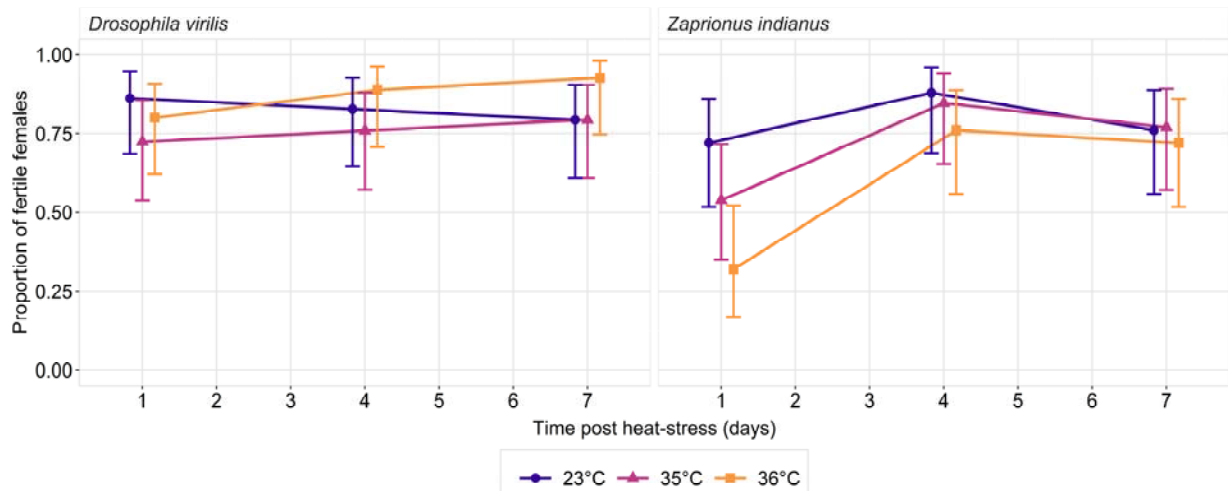

197

198 **Figure 2:** Proportion of fertile *D. virilis* and *Z. indianus* females over time for **Experiment 1:**

199 **Virgin/Heat/Mated**, as described in Fig 1. Virgin females were heat-shocked at either  
200 benign (23°) or two stress temperatures (35 & 36°C) for 4 hours, and paired with 4 male  
201 partners immediately following heat-stress. This mating group was given 3 days to lay eggs,  
202 then tipped onto fresh vials twice, giving three recorded time-points where fertility was  
203 measured. Error bars represent 95% confidence intervals.

204

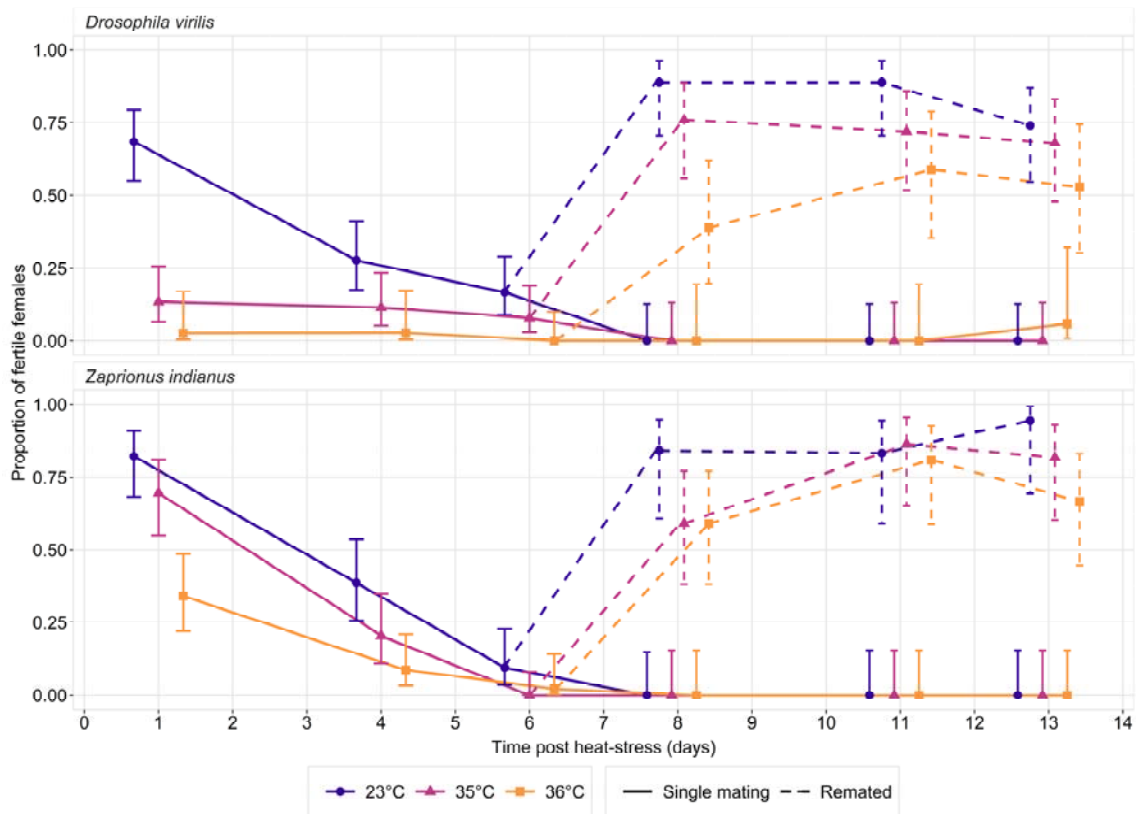

205

206 **Figure 3:** Proportion of fertile *D. virilis* and *Z. indianus* females over time for **Experiment 2:**

207 **Mated/Heat/Isolated** as described in Fig 1. Mated females were heat-shocked at either

208 benign (23°) or two stress temperatures (35 & 36°C) for 4 hours. Following heat stress, all

209 females were isolated and allowed to lay eggs in fresh vials three times. After 6 days, the

210 experiment was split into two treatments. **2a Mated/Heat/FullyIsolated:** females remained

211 isolated and moved onto three fresh vials to lay any remaining eggs. **2b**

212 **Mated/Heat/Isolated/Remated:** focal females were paired with new male partners, and the

213 mating group were given 3 fresh vials to produce offspring. Error bars represent 95%

214 confidence intervals.

215

216

217 **Experiment 1: Virgin/Heat/Mated**

218 There was no significant interaction between temperature and time on fertility of *D. virilis*  
219 from Experiment 1 ( $\chi^2_{(2)} = 3.977$ ,  $p=0.137$ ; Figure 2). There was no main effect of  
220 temperature ( $\chi^2_{(2)} = 0.093$ ,  $p=0.954$ ; Figure 2a), or time ( $\chi^2_{(1)} = 0.301$ ,  $p=0.583$ ; Figure 2) on  
221 fertility of *D. virilis*. Fertility was initially high, and remained so for the three time-points  
222 measured.

223 There was also no significant interaction between temperature and time on fertility of *Z.*  
224 *indianus* from Experiment 1 ( $\chi^2_{(2)} = 3.946$ ,  $p=0.139$ ; Figure 2). While the absolute proportion  
225 of fertile females heated at 36°C was consistently lower than controls, there was no overall  
226 main effect of temperature on fertility of *Z. indianus* ( $\chi^2_{(2)} = 4.469$ ,  $p=0.107$ ; Figure 2).  
227 However, there was a significant effect of time on fertility ( $\chi^2_{(1)} = 10.911$ ,  $p<0.001$ ; Figure 2),  
228 where flies from all temperatures show increased fertility rates over time.

229 **Experiment 2: Mated/Heat/Isolated**

230 Not all females from the pre-stress 'mating' treatment produced offspring, with controls  
231 producing a baseline fertility of around 70% in *D. virilis* and around 80% in *Z. indianus* (Fig.  
232 3).

233 There was a significant interaction between temperature and time on fertility of *D. virilis* in  
234 Experiment 2 prior to treatment splitting ( $\chi^2_{(2)} = 9.943$ ,  $p<0.007$ ; Figure 3). Fertility of  
235 controls started high immediately following heat treatment and fell over time, whereas  
236 fertility at stress temperatures started low and remained low for the duration. There was a  
237 main effect of temperature ( $\chi^2_{(2)} = 21.146$ ,  $p<0.001$ ; Figure 3) and time ( $\chi^2_{(1)} = 17.352$ ,

238  $p < 0.001$ ; Figure 3) on fertility of *D. virilis* in Experiment 2. Both stress temperatures showed  
239 lower fertility than controls, and all treatments showed a decline in fertility over time.  
240 There was no significant interaction between temperature and time on fertility of *Z.*  
241 *indianus* from Experiment 2 ( $\chi^2_{(2)} = 1.777$ ,  $p = 0.411$ ; Figure 3). However, there was a  
242 significant overall effect of temperature ( $\chi^2_{(2)} = 80.161$ ,  $p < 0.001$ ; Figure 3) and time ( $\chi^2_{(1)}$   
243  $= 99.756$ ,  $p < 0.001$ ; Figure 3) on fertility of *Z. indianus*. In this species the highest temperature  
244 of 36°C results in significantly lower fertility than both controls ( $p < 0.001$ ) and the stress  
245 temperature of 35°C ( $p < 0.001$ ). All temperatures result in a loss of fertility over time.

#### 246 **Experiment 2b: Mated/Heat/Isolated/Remated**

247 There was no significant interaction between temperature and time on fertility of *D. virilis*  
248 after females were given the chance to remate in Experiment 2b ( $\chi^2_{(2)} = 3.549$ ,  $p = 0.170$ ;  
249 Figure 3). However, we found a significant effect of temperature on fertility in *D. virilis* ( $\chi^2_{(2)}$   
250  $= 9.520$ ,  $p = 0.009$ ; Figure 3). Specifically, fertility of females exposed to the stress  
251 temperature of 36°C was significantly lower than fertility from the control 23°C ( $p = 0.002$ )  
252 and stress temperature of 35°C ( $p = 0.046$ ). There was no significant effect of time on fertility  
253 ( $\chi^2_{(1)} = 0.515$ ,  $p = 0.473$ ; Figure 3).

254 There was no significant interaction between temperature and time on fertility of *Z.*  
255 *indianus* when females were given the opportunity to remate in Experiment 2b ( $\chi^2_{(2)} =$   
256  $1.049$ ,  $p = 0.592$ ; Figure 3). There was also no main effect of temperature on fertility ( $\chi^2_{(2)}$   
257  $= 4.250$ ,  $p = 0.119$ ; Figure 3). However, there was a significant effect of time on fertility ( $\chi^2_{(1)}$   
258  $= 4.775$ ,  $p = 0.029$ ; Figure 3), where fertility slightly increases over time.

## 259 Discussion

260 We found little evidence that virgin females are susceptible to fertility loss at high  
261 temperatures. Heat-stress did not influence fertility of virgin *D. virilis* or *Z. indianus* females  
262 that were then mated after heat-stress. Fertility of *Z. indianus* females was initially lower at  
263 the first time-point measured post heat-stress, and increased over the duration of the  
264 experiment. Conversely, fertility of *D. virilis* females was consistently high over the duration,  
265 suggesting that *Z. indianus* females were slower to mate and produce offspring with their  
266 paired males than *D. virilis*.

267 Mated females given no opportunity to remate used up their viable sperm reserves within  
268 the first week of laying. However, we found that heat stress sterilised females of both  
269 species, likely through destruction of stored mature sperm. This is curious because mature  
270 sperm in males of both species appear to be largely unaffected by the same temperature  
271 treatments (Parratt et al., 2021). We find that mated females are sterilised at temperatures  
272 around 2°C lower than those required to completely sterilise 80% of males from our study  
273 species (Parratt et al., 2021). Hence our results suggest that females of both species are  
274 worse at protecting mature sperm from high temperatures than males.

275 We found that the temperatures required to sterilise mated females differ between the two  
276 species. Four hours at either 35°C or 36°C almost completely sterilise *D. virilis* females (~90%  
277 of females produce no offspring), whereas mated *Z. indianus* females are mostly fertile  
278 when stressed at 35°C and only a small majority are sterilised when exposed to 36°C for four  
279 hours (~60% of females produce no offspring). The finding that mature sperm from *Z.*  
280 *indianus* is likely more resilient than sperm from *D. virilis* is consistent with our previous  
281 study that heated adult males of each species. Males of *D. virilis* require temperatures of no

282 less than 37°C for 4h to immediately sterilise the majority of males, whereas males of *Z.*  
283 *indianus* are fertile up to their lethal temperature of ~38°C (Parratt et al., 2021). While the  
284 absolute temperatures required to sterilise males and mated females are different, these  
285 results combine to suggest that mature sperm from *Z. indianus* are generally more thermally  
286 robust than those from *D. virilis*. It is unclear exactly why this may be the case, however *Z.*  
287 *indianus* tend to live in slightly warmer areas than *D. virilis*. The temperature experienced by  
288 individuals at the upper edge of their thermal range in the hottest month of the year  
289 (T<sub>max</sub>+1sd: WorldClim.org BIO05) is 36.1°C for *Z. indianus*, whereas it is 32.6°C in *D. virilis*  
290 (Parratt et al., 2021). Therefore, *Z. indianus* sperm may better adapted to high temperatures  
291 than *D. virilis*, although this is beyond the scope of this study.

292 To unpick effects of high temperatures on stored sperm from direct effects on females, we  
293 then gave a chance for mated females to ‘recover’ fertility after they had used up their  
294 viable stored sperm. We found that while the majority of females exposed to all  
295 temperatures were able to produce offspring when paired with new males, females heated  
296 at 36°C performed worse than controls in *D. virilis*. Therefore, it is likely that 36°C thermal  
297 stress results in some permanent damage to females of this species. However, the almost  
298 complete sterilisation of sperm stored in female *D. virilis* paired with a general capacity to  
299 ‘recover’ fertility suggests that initial sterilisation in this species is likely due to the  
300 destruction of stored sperm by high temperatures and not direct effects on females. Mated  
301 *Z. indianus* females were equally able to recover fertility when paired with new males,  
302 regardless of the heat-stress temperature experienced. While the temperatures required to  
303 reduce fertility of mated females were higher in this species, there was no long-term effects  
304 of temperature on female recovery when females were presented with new males,



305 suggesting that this initial reduction of fertility in *Z. indianus* is also driven by effects on  
306 stored sperm.

307 Sterilisation of mated females could be particularly devastating to species with low remating  
308 rates. However, females can use facultative polyandry to improve offspring production  
309 when mating with sub-fertile males (Sutter et al., 2019; Vasudeva et al., 2021). For example,  
310 heat-shocked males of the flour beetle *Tribolium castaneum* have low numbers of viable  
311 sperm after heat-stress (Vasudeva et al., 2021). Here, females increase their remating rate  
312 when mated with a heat-shocked male, rescuing fertility to normal levels. However,  
313 whether increased polyandry is observed when sperm within the female is sterilised by high  
314 temperatures remains an open question. Also, there may be species where facultative  
315 polyandry is impossible, for example in seasonally reproducing animals with discrete mating  
316 opportunities. Those particularly at risk include species that store sperm for long periods of  
317 time, such as hymenopteran insects that have been observed to store sperm for up to 10  
318 years (Keller, 1998; Pamilo, 1991). In these cases, sterilisation of mated females may  
319 actually be worse for population persistence than sterilisation of males.

320 Understanding how high temperatures affect male fertility has improved our ability to  
321 predict the consequences of climate change on species (Parratt et al., 2021; van  
322 Heerwaarden and Sgrò, 2021; Walsh et al., 2019b). When these severe long-term effects on  
323 male fertility are combined with the immediate sterilisation of mated females like we have  
324 demonstrated, the impact of rising temperatures on wild populations may be exacerbated.  
325 Further, we find here that the temperatures required to sterilise mated females are not  
326 always consistent with the temperatures required to sterilise males. It will be important to  
327 determine whether this is true across species and taxa to help forecast vulnerability climate

328 warming effects. Species where sperm in both males and mated females cannot be  
329 protected may be particularly vulnerable, whereas species where females can protect sperm  
330 effectively may be more resilient to an increasing incidence and severity of heat-waves.

### 331 **Acknowledgements**

332 The authors thank Jolanta Taniaris-Hughes for assistance with experiments and Sophie Lyth  
333 for helpful advice regarding experimental design.

### 334 **Funding**

335 This work was funded by a Natural Environment Research Council (NERC) “Adapting to the  
336 Challenges of a Changing Environment” (ACCE) Doctoral Training Partnership studentship to  
337 B.S.W., and NERC grant NE/ P002692/1 to T.A.R.P., AB and RS.

### 338 **Data and materials availability**

339 All data and analysis R code is available at

340 <https://datadryad.org/stash/share/7wn67Q4UVZBXStL1OKTk87xJ9CzXh-GrQ1H2ZoxC7TA>

## 341 References

- 342 **Birkhead, T. and Møller, A.** (1993). Sexual selection and the temporal separation of  
343 reproductive events: sperm storage data from reptiles, birds and mammals. *Biological Journal of the*  
344 *Linnean Society* **50**, 295-311.
- 345 **Cowles, R. B.** (1945). Heat-induced sterility and its possible bearing on evolution. *The*  
346 *American Naturalist* **79**, 160-175.
- 347 **David, J., Araripe, L., Chakir, M., Legout, H., Lemos, B., Petavy, G., Rohmer, C., Joly, D. and**  
348 **Moreteau, B.** (2005). Male sterility at extreme temperatures: a significant but neglected  
349 phenomenon for understanding *Drosophila* climatic adaptations. *Journal of evolutionary biology* **18**,  
350 838-846.
- 351 **Heifetz, Y. and Rivlin, P.** (2010). Beyond the mouse model: using *Drosophila* as a model for  
352 sperm interaction with the female reproductive tract. *Theriogenology* **73**, 723-739.
- 353 **Holt, W. and Lloyd, R.** (2010). Sperm storage in the vertebrate female reproductive tract:  
354 how does it work so well? *Theriogenology* **73**, 713-722.
- 355 **Holt, W. V.** (2011). Mechanisms of sperm storage in the female reproductive tract: an  
356 interspecies comparison. *Reproduction in domestic animals* **46**, 68-74.
- 357 **Hurley, L. L., McDiarmid, C. S., Friesen, C. R., Griffith, S. C. and Rowe, M.** (2018).  
358 Experimental heatwaves negatively impact sperm quality in the zebra finch. *Proceedings of the Royal*  
359 *Society B: Biological Sciences* **285**, 20172547.
- 360 **Iossa, G.** (2019). Sex-specific differences in thermal fertility limits. *Trends in Ecology &*  
361 *Evolution* **34**, 490-492.
- 362 **Janowitz, S. A. and Fischer, K.** (2011). Opposing effects of heat stress on male versus female  
363 reproductive success in *Bicyclus anynana* butterflies. *Journal of Thermal Biology* **36**, 283-287.
- 364 **Jørgensen, K. T., Sørensen, J. G. and Bundgaard, J.** (2006). Heat tolerance and the effect of  
365 mild heat stress on reproductive characters in *Drosophila buzzatii* males. *Journal of Thermal Biology*  
366 **31**, 280-286.
- 367 **Karaca, A., Parker, H., Yeatman, J. and McDaniel, C.** (2002). The effects of heat stress and  
368 sperm quality classification on broiler breeder male fertility and semen ion concentrations. *British*  
369 *poultry science* **43**, 621-628.
- 370 **Keller, L.** (1998). Queen lifespan and colony characteristics in ants and termites. *Insectes*  
371 *Sociaux* **45**, 235-246.
- 372 **Kellermann, V., Overgaard, J., Hoffmann, A. A., Fløjgaard, C., Svenning, J.-C. and Loeschcke,**  
373 **V.** (2012). Upper thermal limits of *Drosophila* are linked to species distributions and strongly  
374 constrained phylogenetically. *Proceedings of the National Academy of Sciences* **109**, 16228-16233.
- 375 **Levine, B. A., Schuett, G. W. and Booth, W.** (2021). Exceptional long-term sperm storage by  
376 a female vertebrate. *PLoS one* **16**, e0252049.
- 377 **McAfee, A., Chapman, A., Higo, H., Underwood, R., Milone, J., Foster, L. J., Guarna, M. M.,**  
378 **Tarpy, D. R. and Pettis, J. S.** (2020). Vulnerability of honey bee queens to heat-induced loss of  
379 fertility. *Nature Sustainability* **3**, 367-376.
- 380 **Pamilo, P.** (1991). Life span of queens in the ant *Formica exsecta*. *Insectes Sociaux* **38**, 111-  
381 119.
- 382 **Parratt, S. R., Walsh, B. S., Metelmann, S., White, N., Manser, A., Bretman, A. J., Hoffmann,**  
383 **A. A., Snook, R. R. and Price, T. A.** (2021). Temperatures that sterilize males better match global  
384 species distributions than lethal temperatures. *Nature Climate Change* **11**, 481-484.
- 385 **Pascini, T. V. and Martins, G. F.** (2017). The insect spermatheca: an overview. *Zoology* **121**,  
386 56-71.
- 387 **Paxton, C. W., Baria, M. V. B., Weis, V. M. and Harii, S.** (2016). Effect of elevated  
388 temperature on fecundity and reproductive timing in the coral *Acropora digitifera*. *Zygote* **24**, 511-  
389 516.

- 390 **Perkins-Kirkpatrick, S. and Lewis, S.** (2020). Increasing trends in regional heatwaves. *Nature*  
391 *Communications* **11**, 1-8.
- 392 **Pitnick, S., Marrow, T. and Spicer, G. S.** (1999). Evolution of multiple kinds of female  
393 sperm-storage organs in *Drosophila*. *Evolution* **53**, 1804-1822.
- 394 **Rohmer, C., David, J. R., Moreteau, B. and Joly, D.** (2004). Heat induced male sterility in  
395 *Drosophila melanogaster*: adaptive genetic variations among geographic populations and role of the  
396 Y chromosome. *Journal of Experimental Biology* **207**, 2735-2743.
- 397 **Sage, T. L., Bagha, S., Lundsgaard-Nielsen, V., Branch, H. A., Sultmanis, S. and Sage, R. F.**  
398 (2015). The effect of high temperature stress on male and female reproduction in plants. *Field Crops*  
399 *Research* **182**, 30-42.
- 400 **Sales, K., Vasudeva, R., Dickinson, M. E., Godwin, J. L., Lumley, A. J., Michalczyk, Ł.,**  
401 **Hebberecht, L., Thomas, P., Franco, A. and Gage, M. J.** (2018). Experimental heatwaves compromise  
402 sperm function and cause transgenerational damage in a model insect. *Nature Communications* **9**, 1-  
403 11.
- 404 **Sasanami, T., Matsuzaki, M., Mizushima, S. and Hiyama, G.** (2013). Sperm storage in the  
405 female reproductive tract in birds. *Journal of Reproduction and Development* **59**, 334-338.
- 406 **Sever, D. M. and Hamlett, W. C.** (2002). Female sperm storage in reptiles. *Journal of*  
407 *Experimental Zoology* **292**, 187-199.
- 408 **Sgrò, C. M., Terblanche, J. S. and Hoffmann, A. A.** (2016). What can plasticity contribute to  
409 insect responses to climate change? *Annual review of Entomology* **61**, 433-451.
- 410 **Sutter, A., Travers, L. M., Oku, K., L. Delaney, K., J. Store, S., Price, T. A. and Wedell, N.**  
411 (2019). Flexible polyandry in female flies is an adaptive response to infertile males. *Behavioral*  
412 *Ecology* **30**, 1715-1724.
- 413 **van Heerwaarden, B. and Sgrò, C. M.** (2021). Male fertility thermal limits predict  
414 vulnerability to climate warming. *Nature Communications* **12**, 1-11.
- 415 **Vasudeva, R., Dickinson, M., Sutter, A., Powell, S., Sales, K. and Gage, M.** (2021).  
416 Facultative polyandry protects females from compromised male fertility caused by heatwave  
417 conditions. *Animal behaviour* **178**, 37-48.
- 418 **Walsh, B. S., Mannion, N. L., Price, T. A. and Parratt, S. R.** (2020). Sex-specific sterility  
419 caused by extreme temperatures is likely to create cryptic changes to the operational sex ratio in  
420 *Drosophila virilis*. *Current Zoology*.
- 421 **Walsh, B. S., Parratt, S. R., Atkinson, D., Snook, R. R., Bretman, A. and Price, T. A.** (2019a).  
422 Integrated approaches to studying male and female thermal fertility limits. *Trends in Ecology &*  
423 *Evolution* **34**, 492-493.
- 424 **Walsh, B. S., Parratt, S. R., Hoffmann, A. A., Atkinson, D., Snook, R. R., Bretman, A. and**  
425 **Price, T. A.** (2019b). The impact of climate change on fertility. *Trends in Ecology & Evolution* **34**, 249-  
426 259.
- 427 **Young, W. C. and Plough, H. H.** (1926). On the sterilization of *Drosophila* by high  
428 temperature. *The Biological Bulletin* **51**, 189-198.
- 429 **Zwoinska, M. K., Rodrigues, L. R., Slate, J. and Snook, R. R.** (2020). Phenotypic Responses to  
430 and Genetic Architecture of Sterility Following Exposure to Sub-Lethal Temperature During  
431 Development. *Frontiers in Genetics* **11**, 573.

432
